# Supplementary material for: Clinical implications of haemodynamics in symptomatic intracranial atherosclerotic stenosis by computational fluid dynamics modelling: a systematic review
Source: HighWire-hosted journal article supplement (doi:10.1136/svn-2024-003202), 2024-05-28
Supplement: svn-2024-003202supp001_data_supplement.pdf [file svn-2024-003202supp001_data_supplement.pdf]

*Clinical Implications of Hemodynamics in Symptomatic Intracranial Atherosclerotic Stenosis by Computational Fluid Dynamics Modeling: A Systematic Review*

Supplemental materials

Supplemental Methods.....3

Supplemental Table S1. Search strategy for PubMed, conducted on 28<sup>th</sup> March 2024 5

Supplemental Table S2. Search strategy for Ovid, conducted on 28<sup>th</sup> March 2024 .....6

Supplemental Table S3. Study characteristics of the 19 primary studies included in this systematic review .....7

Supplemental Table S4. Risk of bias assessment of 19 studies included in the systematic review using a modified Newcastle-Ottawa Scale.....11

Supplemental Table S5. Software for CFD modeling in 19 primary studies included in the systematic review .....13

Supplemental Figure S1. Workflow of CFD modeling .....15

Appendix. The modified Newcastle-Ottawa Scale for risk of bias assessment of the longitudinal and cross-sectional studies included in the systematic review .....16

Supplemental References.....19



## **Supplemental Methods**

### **Study selection**

Two investigators (Y.L. and S.L.) screened the articles identified through literature search, removing duplicates, and excluding irrelevant articles by reading the titles and abstracts. Two investigators (Y.L. and X.L.) then examined the full text for eligible studies according to the inclusion criteria.

### **Data extraction**

Two investigators (Y.L. and X.L.) independently extracted the following data from eligible studies: country/region of study, patient inclusion criteria regarding sICAS, lesion location (anterior and/or posterior circulation), number of cases, neurovascular imaging modality for detecting sICAS and providing source images for vessel segmentation, CFD modeling methods (generic or patient-specific inlet and outlet boundary conditions, rigid or elastic vessel wall assumption, Newtonian or non-Newtonian blood assumption, and steady or transient simulation). More importantly, we recorded the hemodynamic parameters of interest in each study, and the main findings regarding the associations of these hemodynamic metrics with other imaging markers (e.g., stenosis rate, plaque characteristics, and collateral and perfusion status) or clinical features/outcomes (e.g., risk of stroke recurrence, functional outcome, outcomes after certain treatment) in cross-sectional or longitudinal analyses. Discrepancy between the two investigators were resolved by consensus.

**Risk of bias assessment**

Two investigators (Y.L. and S.L.) independently assessed the risk of bias of included studies using a modified Newcastle-Ottawa Scale (mNOS),<sup>1</sup> covering 9 items in the following domains, subject selection, comparability and outcome. Items regarding the quality of outcomes were not assessed in the cross-sectional studies. Longitudinal studies scoring 7-9 and cross-sectional studies scoring 4-6 were considered as having a low risk of bias (Supplemental Appendix).

Supplemental Table S1. Search strategy for PubMed, conducted on 28<sup>th</sup> March 2024

| Search# | Search queries                                                                                                                                                                                                                                                                                                                                                                                                                                                                                                                                                                                                                                                | Number of items found |
|---------|---------------------------------------------------------------------------------------------------------------------------------------------------------------------------------------------------------------------------------------------------------------------------------------------------------------------------------------------------------------------------------------------------------------------------------------------------------------------------------------------------------------------------------------------------------------------------------------------------------------------------------------------------------------|-----------------------|
| #1      | <b>Search:</b> ((intracranial OR intracranial arter* OR intracranial large arter* OR intracranial large-arter* OR cerebral OR cerebral arter* OR cerebral large arter* OR cerebral large-arter* OR anterior circulation OR posterior circulation OR anterior-circulation OR posterior-circulation OR middle cerebral arter* OR anterior cerebral arter* OR posterior cerebral arter* OR basilar arter*) OR ((internal carotid arter* AND (intracranial OR siphon OR terminal OR distal OR C5 OR C6 OR C7 OR C5-7 OR C5-C7)) OR ((vertebral arter* OR vertebrobasilar arter*) AND (intracranial OR terminal OR V4)))) AND (steno* OR occlus* OR atherosclero*) | 93,848                |
| #2      | <b>Search:</b> hemodynamic* OR haemodynamic* OR computational fluid dynamic* OR CFD                                                                                                                                                                                                                                                                                                                                                                                                                                                                                                                                                                           | 295,685               |
| #3      | <b>Search:</b> (#1) AND (#2)                                                                                                                                                                                                                                                                                                                                                                                                                                                                                                                                                                                                                                  | 6,769                 |
| #4      | <b>Search:</b> (#1) AND (#2) Filters: Full text, English, from 2000 - 2024                                                                                                                                                                                                                                                                                                                                                                                                                                                                                                                                                                                    | 3,752                 |

Supplemental Table S2. Search strategy for Ovid, conducted on 28<sup>th</sup> March 2024

| Search# | Search queries                                                                                                                                                                                                                                                                                                                                                                                                                                                                                                                                                                                                                                     | Number of items found |
|---------|----------------------------------------------------------------------------------------------------------------------------------------------------------------------------------------------------------------------------------------------------------------------------------------------------------------------------------------------------------------------------------------------------------------------------------------------------------------------------------------------------------------------------------------------------------------------------------------------------------------------------------------------------|-----------------------|
| #1      | ((intracranial OR intracranial arter* OR intracranial large arter* OR intracranial large-arter* OR cerebral OR cerebral arter* OR cerebral large arter* OR cerebral large-arter* OR anterior circulation OR posterior circulation OR anterior-circulation OR posterior-circulation OR middle cerebral arter* OR anterior cerebral arter* OR posterior cerebral arter* OR basilar arter*) OR ((internal carotid arter* AND (intracranial OR siphon OR terminal OR distal OR C5 OR C6 OR C7 OR C5-7 OR C5-C7)) OR ((vertebral arter* OR vertebrobasilar arter*) AND (intracranial OR terminal OR V4)))) AND (steno* OR occlus* OR atherosclero*).af. | 114,678               |
| #2      | (hemodynamic* or haemodynamic* or computational fluid dynamic* or CFD).af.                                                                                                                                                                                                                                                                                                                                                                                                                                                                                                                                                                         | 407,081               |
| #3      | 1 and 2                                                                                                                                                                                                                                                                                                                                                                                                                                                                                                                                                                                                                                            | 8,322                 |
| #4      | limit 3 to (full text and english language and yr="2000 -Current")                                                                                                                                                                                                                                                                                                                                                                                                                                                                                                                                                                                 | 1,473                 |

Supplemental Table S3. Study characteristics of the 19 primary studies included in this systematic review

| Study                                                                                                         | Country | Patient inclusion criteria | Anterior/ Posterior circulation   | Number of cases | Neurovascular imaging modality | CFD model setup          |                           |                       |                                |                                | Hemodynamic parameters in CFD model | Main findings on clinical implications                                                                                                                                                                                                                                                                                                                                                                                 |
|---------------------------------------------------------------------------------------------------------------|---------|----------------------------|-----------------------------------|-----------------|--------------------------------|--------------------------|---------------------------|-----------------------|--------------------------------|--------------------------------|-------------------------------------|------------------------------------------------------------------------------------------------------------------------------------------------------------------------------------------------------------------------------------------------------------------------------------------------------------------------------------------------------------------------------------------------------------------------|
|                                                                                                               |         |                            |                                   |                 |                                | Inlet boundary condition | Outlet boundary condition | Vessel wall condition | Newtonian/ non-Newtonian blood | Steady vs Transient simulation |                                     |                                                                                                                                                                                                                                                                                                                                                                                                                        |
| Correlations with anatomical characteristics of the sICAS lesions in cross-sectional and longitudinal studies |         |                            |                                   |                 |                                |                          |                           |                       |                                |                                |                                     |                                                                                                                                                                                                                                                                                                                                                                                                                        |
| Nam et al. 2016 <sup>15</sup>                                                                                 | China   | 50-99% sICAS               | Anterior circulation              | 56              | CTA                            | Generic                  | Generic                   | Rigid, non-slip       | Newtonian                      | Steady                         | PR、SSR ratio、Velocity ratio         | Lower PR (p<0.001) was found in sICAS lesions with severe (70-99%) stenosis than moderate (50-69%) stenosis.                                                                                                                                                                                                                                                                                                           |
| Liu et al. 2017 <sup>11</sup>                                                                                 | China   | 70-99% sICAS               | Anterior & posterior circulations | 11              | CTA                            | Patient-specific         | Generic LPM               | Rigid, non-slip       | Newtonian                      | Transient                      | PR                                  | PR was not linearly proportional to the stenosis rate in patients with sICAS.                                                                                                                                                                                                                                                                                                                                          |
| Zhang et al. 2021 <sup>16</sup>                                                                               | China   | 50-99% sICAS               | Anterior circulation              | 40              | TOF-MRA                        | Generic                  | Generic                   | Rigid, non-slip       | Newtonian                      | Transient                      | PR、WSSR                             | Higher WSSR (medians 9.98 vs. 5.99, p=0.004) and higher WSS (means 53.99 Pa vs. 39.98 Pa, p=0.023) at the narrowest location in plaques with positive than negative remodeling; Positive correlation of the remodeling index (Pearson's r=0.376, p=0.026) and plaque area (Pearson's r=0.407, p=0.015) with WSSR; No significant association of PR (medians 0.92 vs. 0.96, p=0.260) with positive/negative remodeling. |
| Lan et al. 2020 <sup>13</sup>                                                                                 | China   | 50-99% sICAS               | Anterior & posterior circulations | 39              | CTA                            | Generic                  | Generic                   | Rigid, non-slip       | Newtonian                      | Steady                         | rWSS measures                       | A higher maximum WSS (adjusted OR:1.20, 95%CI:1.03-1.39, p=0.019) and larger rWSS of the high-WSS region (adjusted OR:1.53, 95%CI:1.07-2.19, p=0.021), across the sICAS lesion or measured in the proximal and distal segments of the lesion, were independently associated with stenosis regression of sICAS over 1 year.                                                                                             |
| Correlations with collateral and perfusion status in cross-sectional studies                                  |         |                            |                                   |                 |                                |                          |                           |                       |                                |                                |                                     |                                                                                                                                                                                                                                                                                                                                                                                                                        |
| Leng et al. 2018 <sup>17</sup>                                                                                | China   | 50-99% sICAS               | Anterior circulation              | 85              | CTA                            | Generic                  | Generic                   | Rigid, non-slip       | Newtonian                      | Steady                         | Pressure gradient                   | A larger pressure gradient correlated with good leptomeningeal collaterals (adjusted OR for 10 mmHg increment in absolute pressure gradient:1.70, 95%CI:1.06-2.74, p=0.029).                                                                                                                                                                                                                                           |

| Study                                                                    | Country | Patient inclusion criteria | Anterior/Posterior circulation    | Number of cases | Neurovascular imaging modality | CFD model setup          |                                      |                       |                               |                                | Hemodynamic parameters in CFD model | Main findings on clinical implications                                                                                                                                                                                                                                                                                                                                                                                                                                      |
|--------------------------------------------------------------------------|---------|----------------------------|-----------------------------------|-----------------|--------------------------------|--------------------------|--------------------------------------|-----------------------|-------------------------------|--------------------------------|-------------------------------------|-----------------------------------------------------------------------------------------------------------------------------------------------------------------------------------------------------------------------------------------------------------------------------------------------------------------------------------------------------------------------------------------------------------------------------------------------------------------------------|
|                                                                          |         |                            |                                   |                 |                                | Inlet boundary condition | Outlet boundary condition            | Vessel wall condition | Newtonian/non-Newtonian blood | Steady vs Transient simulation |                                     |                                                                                                                                                                                                                                                                                                                                                                                                                                                                             |
| Lan et al. 2020 <sup>18</sup>                                            | China   | 50-99% sICAS               | Anterior circulation              | 83              | CTA                            | Generic                  | Generic                              | Rigid, non-slip       | Newtonian                     | Steady                         | PR                                  | Lower PR (means 0.79 vs. 0.90, p=0.015) and better leptomeningeal collateral status (56.7% vs. 34.5% with good LMCs, p=0.079) among patients with severe stenosis (70-99%) than those with moderate stenosis (50-69%); Cerebral perfusion supplying stenotic territory may depend more on leptomeningeal collateral flow (Pearson's r=0.038, p=0.051) in patients with severe stenosis but more on antegrade blood flow (Pearson's r=-0.605, p<0.001) in moderate stenosis. |
| Wang et al. 2023 <sup>19</sup>                                           | China   | 30-99% sICAS               | Anterior & posterior circulations | 18              | Biplane DSA                    | Patient-specific         | Patient-specific                     | Rigid, non-slip       | Newtonian                     | Steady                         | PR                                  | PR was negatively correlated with Tmax (Spearman's r=-0.73, p<0.01), the duration to the maximum of residue function.                                                                                                                                                                                                                                                                                                                                                       |
| Raynald et al. 2023 <sup>12</sup>                                        | China   | 50-70% sICAS               | Anterior & posterior circulations | 20              | CTA                            | Generic                  | Patient-specific developed algorithm | Rigid, non-slip       | Newtonian                     | Transient                      | Pressure、Velocity                   | Good agreement on blood flowrate derived from CFD modeling and TCD measurements (mean difference:-0.78 ml/s, p for Bland-Altman test=0.027); Less agreement on mean velocities derived from CFD modeling and TCD assessment (mean difference:-0.05 cm/s, p for Bland-Altman test=0.399).                                                                                                                                                                                    |
| Yin et al. 2024 <sup>10</sup>                                            | China   | 50-99% sICAS               | Anterior & posterior circulations | 10              | CTA                            | Generic                  | Generic LPM                          | Rigid, non-slip       | Newtonian                     | Transient                      | PR                                  | Significantly lower PR in patients with apparent hypoperfusion than those with normal perfusion defined in 4D CTA (means 0.38 vs. 0.76, p< 0.01).                                                                                                                                                                                                                                                                                                                           |
| Correlations with stroke mechanisms in cross-sectional studies           |         |                            |                                   |                 |                                |                          |                                      |                       |                               |                                |                                     |                                                                                                                                                                                                                                                                                                                                                                                                                                                                             |
| Feng et al. 2023 <sup>21</sup>                                           | China   | 50-99% sICAS               | Anterior circulation              | 99              | CTA                            | Generic                  | Generic                              | Rigid, non-slip       | Newtonian                     | Steady                         | PR、WSSR                             | High WSS was an independent predictor of artery-to-artery embolism (adjusted OR:3.90, 95%CI:1.22-12.47, p=0.022) in sICAS patients of anterior circulation with low PR (PR≤median).                                                                                                                                                                                                                                                                                         |
| Li et al. 2024 <sup>22</sup>                                             | China   | 50-99% sICAS               | Anterior circulation              | 84              | CTA                            | Generic                  | Generic                              | Rigid, non-slip       | Newtonian                     | Steady                         | PR                                  | Low PR (PR≤median) was independently associated with internal borderzone infarcts (adjusted OR:4.22, p=0.026), but not cortical borderzone infarcts.                                                                                                                                                                                                                                                                                                                        |
| Correlations with cerebral small vessel disease in cross-sectional study |         |                            |                                   |                 |                                |                          |                                      |                       |                               |                                |                                     |                                                                                                                                                                                                                                                                                                                                                                                                                                                                             |



| Study                                                                                      | Country | Patient inclusion criteria | Anterior/Posterior circulation    | Number of cases | Neurovascular imaging modality | CFD model setup          |                           |                       |                               |                                | Hemodynamic parameters in CFD model | Main findings on clinical implications                                                                                                                                                                                                                                                                                                                    |
|--------------------------------------------------------------------------------------------|---------|----------------------------|-----------------------------------|-----------------|--------------------------------|--------------------------|---------------------------|-----------------------|-------------------------------|--------------------------------|-------------------------------------|-----------------------------------------------------------------------------------------------------------------------------------------------------------------------------------------------------------------------------------------------------------------------------------------------------------------------------------------------------------|
|                                                                                            |         |                            |                                   |                 |                                | Inlet boundary condition | Outlet boundary condition | Vessel wall condition | Newtonian/non-Newtonian blood | Steady vs Transient simulation |                                     |                                                                                                                                                                                                                                                                                                                                                           |
| Zheng et al. 2024 <sup>24</sup>                                                            | China   | 50-99% sICAS               | Anterior circulation              | 112             | CTA                            | Generic                  | Generic                   | Rigid, non-slip       | Newtonian                     | Steady                         | PR、WSSR                             | Abnormal PR (PR≤median) and WSSR (WSSR≥fourth quartile) were associated with moderate-to-severe white matter hyperintensities (adjusted OR:10.12, p=0.018), cortical microinfarcts presence (adjusted OR:5.25, p=0.003), and moderate-to-severe cerebral small vessel disease burden (adjusted OR:12.55, p=0.033) in the ipsilateral hemisphere to sICAS. |
| Correlations with the risk of stroke recurrence in medically treated sICAS patients        |         |                            |                                   |                 |                                |                          |                           |                       |                               |                                |                                     |                                                                                                                                                                                                                                                                                                                                                           |
| Leng et al. 2014 <sup>14</sup>                                                             | China   | 70-99% sICAS               | Anterior & posterior circulations | 32              | CTA                            | Generic                  | Generic                   | Rigid, non-slip       | Newtonian                     | Steady                         | PR、SSR ratio、Velocity ratio         | Higher SSR ratio (HR:1.03, 95%CI: 1.00-1.05, p=0.023) and higher velocity ratio (HR:1.03, 95%CI:1.00-1.06, p=0.035) were associated with recurrent ischemic stroke in the same-territory within 1 year.                                                                                                                                                   |
| Leng et al. 2019 <sup>7</sup>                                                              | China   | 50-99% sICAS               | Anterior & posterior circulations | 245             | CTA                            | Generic                  | Generic                   | Rigid, non-slip       | Newtonian                     | Steady                         | PR、WSSR                             | Low PR (PR≤median, adjusted HR:3.16, 95%CI:1.15-8.72, p=0.026) and high WSSR (WSSR≥4th quartile, adjusted HR:3.05, 95%CI: 1.25-7.41, p=0.014), separately or combined, were independently associated with recurrent same-territory ischemic stroke within 1 year.                                                                                         |
| Tian et al. 2022 <sup>25</sup>                                                             | China   | 50-99% sICAS               | Anterior & posterior circulations | 245             | CTA                            | Generic                  | Generic                   | Rigid, non-slip       | Newtonian                     | Steady                         | PR、WSSR                             | A nomogram incorporating diabetes, dyslipidemia, hemodynamic significance (PR and WSSR) of sICAS, hypertension and age ≥50 years could be a useful tool to stratify sICAS patients receiveing medical treatment for the risk of recurrent ischemic stroke in the same-territory.                                                                          |
| Feng et al. 2020 <sup>26</sup>                                                             | China   | 50-99% sICAS               | Anterior & posterior circulations | 157             | CTA                            | Generic                  | Generic                   | Rigid, non-slip       | Newtonian                     | Steady                         | PR                                  | Low (≤130mmHg) systolic blood pressure level (HR:5.08, 95%CI:1.05-24.49, p=0.043) may be associated with increased risk of recurrent stroke in the same-territory in sICAS with a large translesional pressure gradient.                                                                                                                                  |
| Correlations with functional outcome in sICAS patients receiving acute reperfusion therapy |         |                            |                                   |                 |                                |                          |                           |                       |                               |                                |                                     |                                                                                                                                                                                                                                                                                                                                                           |

| Study                                                                  | Country | Patient inclusion criteria                                                                    | Anterior/Posterior circulation | Number of cases | Neurovascular imaging modality | CFD model setup          |                           |                       |                               |                                | Hemodynamic parameters in CFD model | Main findings on clinical implications                                                                                                                                                                                                                                                                                                                                                                                          |
|------------------------------------------------------------------------|---------|-----------------------------------------------------------------------------------------------|--------------------------------|-----------------|--------------------------------|--------------------------|---------------------------|-----------------------|-------------------------------|--------------------------------|-------------------------------------|---------------------------------------------------------------------------------------------------------------------------------------------------------------------------------------------------------------------------------------------------------------------------------------------------------------------------------------------------------------------------------------------------------------------------------|
|                                                                        |         |                                                                                               |                                |                 |                                | Inlet boundary condition | Outlet boundary condition | Vessel wall condition | Newtonian/non-Newtonian blood | Steady vs Transient simulation |                                     |                                                                                                                                                                                                                                                                                                                                                                                                                                 |
| Wu et al. 2022 <sup>27</sup>                                           | China   | Patients receiving intravenous thrombolysis or acute endovascular treatment with 50-99% sICAS | Anterior circulation           | 120             | TOF-MRA                        | Generic                  | Patient-specific          | Rigid, non-slip       | Newtonian                     | Steady                         | PR, WSSR                            | WSSR before intravenous thrombolysis or acute endovascular treatment (OR:0.86, 95%CI:0.75-0.99, p=0.041) and difference in WSSR before and after such treatment (OR:0.72, 95%CI:0.52-1.03, p=0.043) were correlated with functional outcome at 3 months; Adding the two WSSR measures yielded higher predictive ability for the functional outcome, compared with prediction models including clinical variables only (p<0.05). |
| Changes of the hemodynamic parameters in sICAS with stenting treatment |         |                                                                                               |                                |                 |                                |                          |                           |                       |                               |                                |                                     |                                                                                                                                                                                                                                                                                                                                                                                                                                 |
| Zhang et al. 2022 <sup>28</sup>                                        | China   | 70-99% sICAS                                                                                  | Anterior circulation           | 51              | 3DRA                           | Generic                  | Generic                   | Rigid, non-slip       | Newtonian                     | Transient                      | Pressure, Velocity, Vorticity, WSS  | Endovascular stent angioplasty could reduce the pressure loss (means 6.46 Pa vs. 12.84 Pa, p<0.001) across the sICAS lesion compared with that before stenting.                                                                                                                                                                                                                                                                 |
| Zhou et al. 2023 <sup>29</sup>                                         | China   | 70-99% sICAS                                                                                  | Posterior circulation          | 62              | 3DRA                           | Generic                  | Generic                   | Rigid, non-slip       | Newtonian                     | Transient                      | Pressure, Velocity, Vorticity, WSS  | Significantly reduced WSS (means 14.84 Pa vs. 139.49 Pa, p<0.001) at the stenosis segment after stenting treatment.                                                                                                                                                                                                                                                                                                             |

sICAS, symptomatic intracranial atherosclerotic stenosis, symptomatic intracranial atherosclerosis; CTA, computed tomography angiography;

TOF-MRA, time of flight-magnetic resonance angiography; DSA, digital subtraction angiography; 3DRA, three-dimensional rotational

angiography; LPM, lumped parameter model; PR, pressure ratio; SSR, shear strain rate; WSSR, wall shear stress ratio; rWSS, relative wall shear

stress; WSS, wall shear stress; OR, odds ratio; CI, confidential interval; TCD, transcranial doppler ultrasound; HR, hazard ratio

Supplemental Table S4. Risk of bias assessment of 19 studies included in the systematic review using a modified Newcastle-Ottawa Scale

| Study                             | Selection                        |             |                     | Comparability                                                    |                                                                 |                        | Outcome                                         |                        | Risk of bias |
|-----------------------------------|----------------------------------|-------------|---------------------|------------------------------------------------------------------|-----------------------------------------------------------------|------------------------|-------------------------------------------------|------------------------|--------------|
|                                   | Representativeness of the sample | Sample size | Assessment of sICAS | Demonstration of clinical implications of hemodynamic parameters | Comparability of studies on the basis of the design or analysis | Assessment of Outcome# | Was follow-up long enough for outcome to occur# | Adequacy of follow-up# |              |
| Longitudinal studies              |                                  |             |                     |                                                                  |                                                                 |                        |                                                 |                        |              |
| Leng et al. 2014 <sup>2</sup>     | *                                |             | *                   | *                                                                | *                                                               | *                      | *                                               | *                      | 7            |
| Leng et al. 2019 <sup>3</sup>     | *                                | *           | *                   | *                                                                | **                                                              | *                      | *                                               | *                      | 9            |
| Feng et al. 2020 <sup>4</sup>     | *                                | *           | *                   | *                                                                | *                                                               | *                      | *                                               | *                      | 8            |
| Lan et al. 2020 <sup>5</sup>      | *                                |             | *                   | *                                                                | *                                                               | *                      | *                                               | *                      | 7            |
| Zhang et al. 2022 <sup>6</sup>    | *                                |             | *                   | *                                                                |                                                                 | *                      |                                                 | *                      | 5            |
| Wu et al. 2022 <sup>7</sup>       | *                                | *           | *                   | *                                                                | *                                                               | *                      |                                                 | *                      | 7            |
| Tian et al. 2022 <sup>8</sup>     | *                                | *           | *                   | *                                                                | *                                                               | *                      | *                                               | *                      | 8            |
| Zhou et al. 2023 <sup>9</sup>     | *                                |             | *                   | *                                                                |                                                                 | *                      |                                                 | *                      | 5            |
| Cross-sectional studies           |                                  |             |                     |                                                                  |                                                                 |                        |                                                 |                        |              |
| Nam et al. 2016 <sup>10</sup>     | *                                |             | *                   | *                                                                |                                                                 | —                      | —                                               | —                      | 3            |
| Liu et al. 2017 <sup>11</sup>     | *                                |             | *                   | *                                                                |                                                                 | —                      | —                                               | —                      | 3            |
| Leng et al. 2018 <sup>12</sup>    | *                                |             | *                   | *                                                                | **                                                              | —                      | —                                               | —                      | 5            |
| Lan et al. 2020 <sup>13</sup>     | *                                |             | *                   | *                                                                | *                                                               | —                      | —                                               | —                      | 4            |
| Zhang et al. 2021 <sup>14</sup>   | *                                |             | *                   | *                                                                |                                                                 | —                      | —                                               | —                      | 3            |
| Wang et al. 2023 <sup>15</sup>    | *                                |             | *                   | *                                                                |                                                                 | —                      | —                                               | —                      | 3            |
| Raynald et al. 2023 <sup>16</sup> | *                                |             | *                   | *                                                                |                                                                 | —                      | —                                               | —                      | 3            |
| Feng et al. 2023 <sup>17</sup>    | *                                |             | *                   | *                                                                | **                                                              | —                      | —                                               | —                      | 5            |
| Yin et al. 2024 <sup>18</sup>     | *                                |             | *                   | *                                                                |                                                                 | —                      | —                                               | —                      | 3            |

|                                    |   |   |   |   |   |   |   |   |   |
|------------------------------------|---|---|---|---|---|---|---|---|---|
| Zheng et al.<br>2024 <sup>19</sup> | * | * | * | * | * | — | — | — | 5 |
| Li et al.<br>2024 <sup>20</sup>    | * |   | * | * | * | — | — | — | 4 |

sICAS, symptomatic intracranial atherosclerotic stenosis  
#Not assessed in cross-sectional studies

Supplemental Table S5. Software for CFD modeling in 19 primary studies included in the systematic review

| Study                           | 3D reconstruction         | Mesh generation | Boundary condition setup & Simulation | Postprocessing |
|---------------------------------|---------------------------|-----------------|---------------------------------------|----------------|
| Leng et al. 2014 <sup>2</sup>   | Vascular Modeling Toolkit | ANSYS ICEM CFD  | ANSYS CFX                             | ANSYS CFD-Post |
| Nam et al. 2016 <sup>10</sup>   | Unknown                   | ANSYS ICEM CFD  | ANSYS CFX                             | Unknown        |
| Liu et al. 2017 <sup>11</sup>   | Mimics                    | ANSYS ICEM CFD  | ANSYS CFX                             | Unknown        |
| Leng et al. 2018 <sup>12</sup>  | Mimics                    | ANSYS ICEM CFD  | ANSYS CFX                             | CFD-Post       |
| Leng et al. 2019 <sup>3</sup>   | Mimics                    | ANSYS ICEM CFD  | ANSYS CFX                             | CFD-Post       |
| Lan et al. 2020 <sup>13</sup>   | Mimics                    | ANSYS ICEM CFD  | ANSYS CFX                             | CFD-Post       |
| Feng et al. 2020 <sup>4</sup>   | Mimics                    | ANSYS ICEM CFD  | ANSYS CFX                             | CFD-Post       |
| Lan et al. 2020 <sup>5</sup>    | Mimics                    | ANSYS ICEM CFD  | ANSYS CFX                             | CFD-Post       |
| Zhang et al. 2021 <sup>14</sup> | Mimics                    | ANSYS ICEM CFD  | ANSYS Fluent                          | Unknown        |
| Zhang et al. 2022 <sup>6</sup>  | Amira                     | Sharc Harpoon   | ANSYS                                 | Ensignt        |
| Wu et al. 2022 <sup>7</sup>     | Mimics                    | ANSYS ICEM CFD  | ANSYS Fluent                          | CFD-Post       |

| Study                             | 3D reconstruction | Mesh generation | Boundary condition setup & Simulation | Postprocessing |
|-----------------------------------|-------------------|-----------------|---------------------------------------|----------------|
| Tian et al. 2022 <sup>8</sup>     | Mimics            | ANSYS ICEM CFD  | ANSYS CFX                             | CFD-Post       |
| Wang et al. 2023 <sup>15</sup>    | AccuFFicas        | AccuFFicas      | AccuFFicas                            | AccuFFicas     |
| Raynald et al. 2023 <sup>16</sup> | Mimics            | ANSYS ICEM CFD  | ANSYS CFX                             | Unknown        |
| Feng et al. 2023                  | Mimics            | ANSYS ICEM CFD  | ANSYS CFX                             | CFD-Post       |
| Zhou et al. 2023 <sup>9</sup>     | Amira             | Share Harpoon   | ANSYS                                 | Ensign         |
| Yin et al. 2024 <sup>18</sup>     | Mimics            | SimVascular     | Unknown                               | Paraview       |
| Zheng et al. 2024 <sup>19</sup>   | Mimics            | ANSYS ICEM CFD  | ANSYS CFX                             | CFD-Post       |
| Li et al. 2024 <sup>20</sup>      | Mimics            | ANSYS ICEM CFD  | ANSYS CFX                             | CFD-Post       |

Supplemental Figure S1. Workflow of CFD modeling

CFD modeling for ICAS mostly involves the following steps: 1) Reconstruction of the arteries of interest from source images of neurovascular exams; 2) Generation of a mesh in the vessel lumen, wall and inlet/outlet; 3) Setup of boundary conditions on inlet/outlet and blood properties; 4) Simulation of blood flow by solving fluid dynamics equations; 5) Postprocessing of hemodynamic parameters.

Abbreviations: CFD, computational fluid dynamics; ICAS, intracranial atherosclerotic stenosis; 3D, three-dimensional

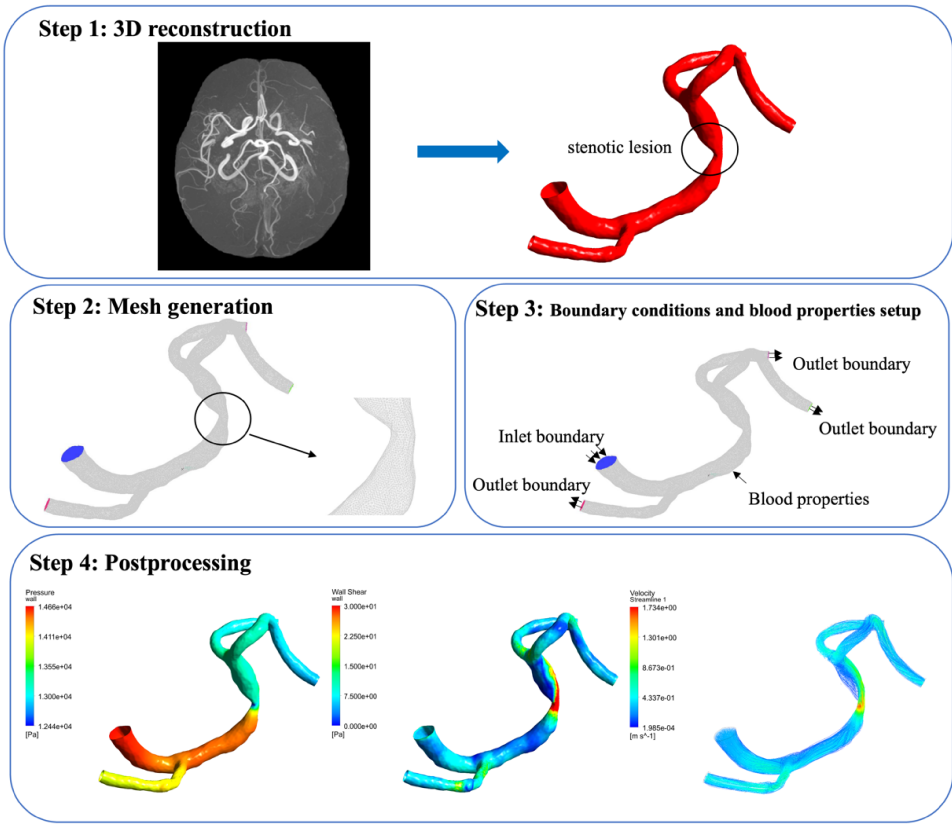

## **Appendix. The modified Newcastle-Ottawa Scale for risk of bias assessment of the longitudinal and cross-sectional studies included in the systematic review**

### **Selection**

#### **1. Representativeness of the subjects:**

- a. Truly representative of the target subjects. \*
- b. Somewhat representative of the target subjects.
- c. Selected group of users.
- d. No description of the derivation of the included subjects.

#### **2. Sample size:**

- a. Sample size  $\geq 100$ . \*
- b. Sample size  $< 100$ .

#### **3. Assessment of sICAS:**

- a. Standard assessment using imaging methods. \*
- b. Non-standard imaging methods used.
- b. No description.

#### **4. Demonstration of clinical implications of hemodynamic parameters**

- a. Yes \*
- b. No

### **Comparability**

#### **5. Comparability of studies on the basis of the design or analysis:**

- a. study controls for the most important confounding factor (e.g., demographics like age and sex). \*



- b. study controls for other confounding factors (other baseline characteristics, e.g., stenosis severity, leptomeningeal collateral status). \*

## **Outcome**

### **6. Assessment of Outcome<sup>#</sup>:**

- a. Valid/reliable measurement. \*
- b. Outcome data collected directly from the subjects.
- c. Method of outcome assessment not described.
- d. No description

### **7. Was follow-up long enough for outcome to occur<sup>#</sup>:**

- a. At least 12 months of follow-up. \*
- b. Less than 12 months of follow-up.
- c. Length of follow-up not reported.

### **8. Adequacy of follow-up<sup>#</sup>:**

- a. No or small loss to follow-up. \*
- b. Large amount of loss to follow-up.
- c. No statement.

#Not assessed in cross-sectional studies.

This scale for risk of bias assessment has been adapted from the Newcastle-Ottawa

Scale<sup>1</sup>. For longitudinal study, the scale ranges from 0 to 9, with  $\geq 7$  indicating low risk

of bias and  $< 6$  indicating high risk of bias. For cross-sectional study, the scale ranges

from 0 to 6, with  $\geq 4$  indicating low risk of bias and  $< 3$  indicating high risk of bias.

## Supplemental References

- 1 Stang A. Critical evaluation of the Newcastle-Ottawa scale for the assessment of the quality of nonrandomized studies in meta-analyses. *Eur J Epidemiol* 2010;25:603-5.
- 2 Leng X, Scalzo F, Ip HL, et al. Computational fluid dynamics modeling of symptomatic intracranial atherosclerosis may predict risk of stroke recurrence. *PLoS One* 2014;9:e97531.
- 3 Leng X, Lan L, Ip HL, et al. Hemodynamics and stroke risk in intracranial atherosclerotic disease. *Ann Neurol* 2019;85:752-64.
- 4 Feng X, Chan KL, Lan L, et al. Translesional Pressure Gradient Alters Relationship Between Blood Pressure and Recurrent Stroke in Intracranial Stenosis. *Stroke* 2020;51:1862-4.
- 5 Lan L, Liu H, Ip V, et al. Regional High Wall Shear Stress Associated With Stenosis Regression in Symptomatic Intracranial Atherosclerotic Disease. *Stroke* 2020;51:3064-73.
- 6 Zhang K, Ren W, Li TX, et al. Sub-satisfactory recanalization of severe middle cerebral artery stenoses can significantly improve hemodynamics. *Front Cardiovasc Med* 2022;9:922616.
- 7 Wu J, Wang P, Zhou L, et al. Hemodynamics derived from computational fluid dynamics based on magnetic resonance angiography is associated with functional outcomes in atherosclerotic middle cerebral artery stenosis. *Quant Imaging Med Surg* 2022;12:688-98.

- 8 Tian X, Fang H, Lan L, et al. Risk stratification in symptomatic intracranial atherosclerotic disease with conventional vascular risk factors and cerebral haemodynamics. *Stroke Vasc Neurol* 2022;8(1):77-85.
- 9 Zhou ZL, Zhu LF, Li TX, et al. Sub-satisfactory stenting recanalization of severe vascular stenosis of the posterior circulation can significantly improve cerebral hemodynamic perfusion. *Eur J Radiol* 2023;169:111135.
- 10 Nam HS, Scalzo F, Leng X, et al. Hemodynamic Impact of Systolic Blood Pressure and Hematocrit Calculated by Computational Fluid Dynamics in Patients with Intracranial Atherosclerosis. *J Neuroimaging* 2016;26:331-8.
- 11 Liu J, Yan Z, Pu Y, et al. Functional assessment of cerebral artery stenosis: A pilot study based on computational fluid dynamics. *J Cereb Blood Flow Metab* 2017;37:2567-76.
- 12 Leng X, Lan L, Ip HL, et al. Translesional pressure gradient and leptomeningeal collateral status in symptomatic middle cerebral artery stenosis. *Eur J Neurol* 2018;25:404-10.
- 13 Lan L, Leng X, Ip V, et al. Sustaining cerebral perfusion in intracranial atherosclerotic stenosis: The roles of antegrade residual flow and leptomeningeal collateral flow. *J Cereb Blood Flow Metab* 2020;40:126-34.
- 14 Zhang D, Wu X, Tang J, et al. Hemodynamics is associated with vessel wall remodeling in patients with middle cerebral artery stenosis. *Eur Radiol* 2021;31:5234-42.

- 15 Wang M, Leng X, Mao B, et al. Functional evaluation of intracranial atherosclerotic stenosis by pressure ratio measurements. *Heliyon* 2023;9:e13527.
- 16 Raynald, Zhao X, Meng L, et al. A novel computational fluid dynamic method and validation for assessing distal cerebrovascular microcirculatory resistance. *Comput Methods Programs Biomed* 2023;230:107338.
- 17 Feng X, Fang H, Ip BYM, et al. Cerebral Hemodynamics Underlying Artery-to-Artery Embolism in Symptomatic Intracranial Atherosclerotic Disease. *Transl Stroke Res* 2023.
- 18 Yin Z, Zhou C, Guo J, et al. CT-derived fractional flow reserve in intracranial arterial stenosis: A pilot study based on computational fluid dynamics. *Eur J Radiol* 2024;171:111285.
- 19 Zheng L, Tian X, Abrigo J, et al. Hemodynamic significance of intracranial atherosclerotic disease and ipsilateral imaging markers of cerebral small vessel disease. *Eur Stroke J* 2024;9:144-53.
- 20 Li S, Tian X, Ip B, et al. Cerebral hemodynamics and stroke risks in symptomatic intracranial atherosclerotic stenosis with internal versus cortical borderzone infarcts: A computational fluid dynamics study. *J Cereb Blood Flow Metab* 2024;44:516-26.
