# Supplementary figures and images for: Clinical implications of haemodynamics in symptomatic intracranial atherosclerotic stenosis by computational fluid dynamics modelling: a systematic review
Source: HighWire-hosted journal article supplement (doi:10.1136/svn-2024-003202), 2024-05-28

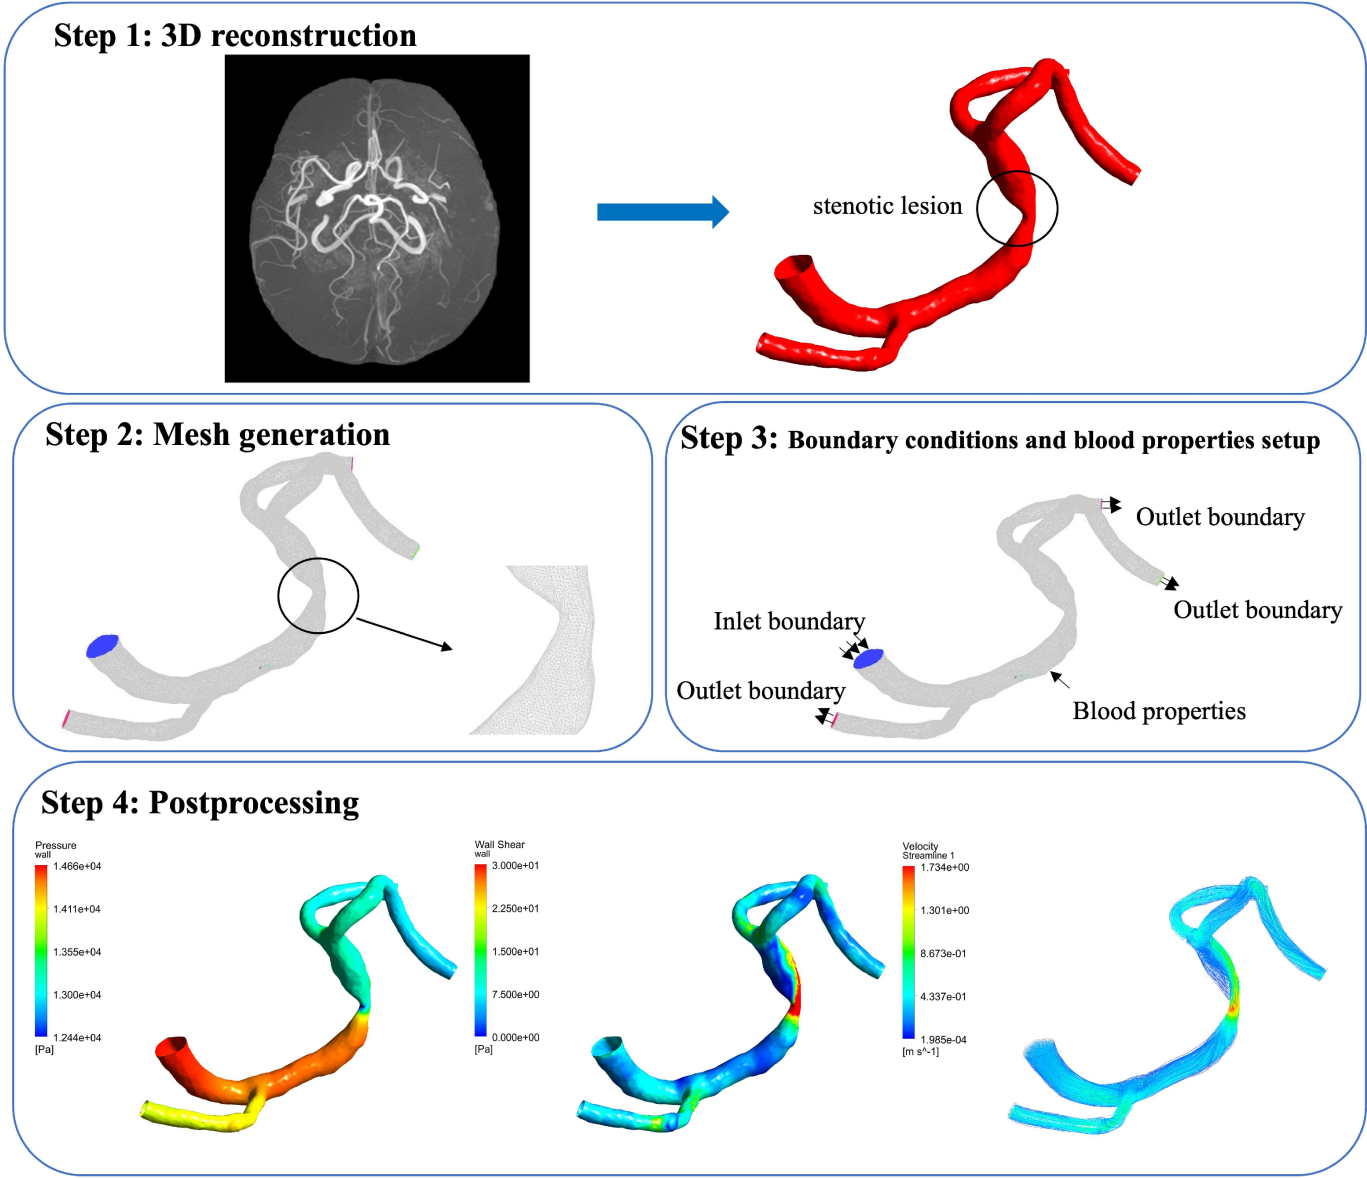

Supplement: svn-2024-003202supp002_data_supplement.pdf [file svn-2024-003202supp002_data_supplement.pdf]
